# Supplementary material
Source: Springer Nature journal article supplement (https://www.springermedizin.de/resource/supplementary/13023_2009_163_MOESM5_ESM.pdf/9641766)

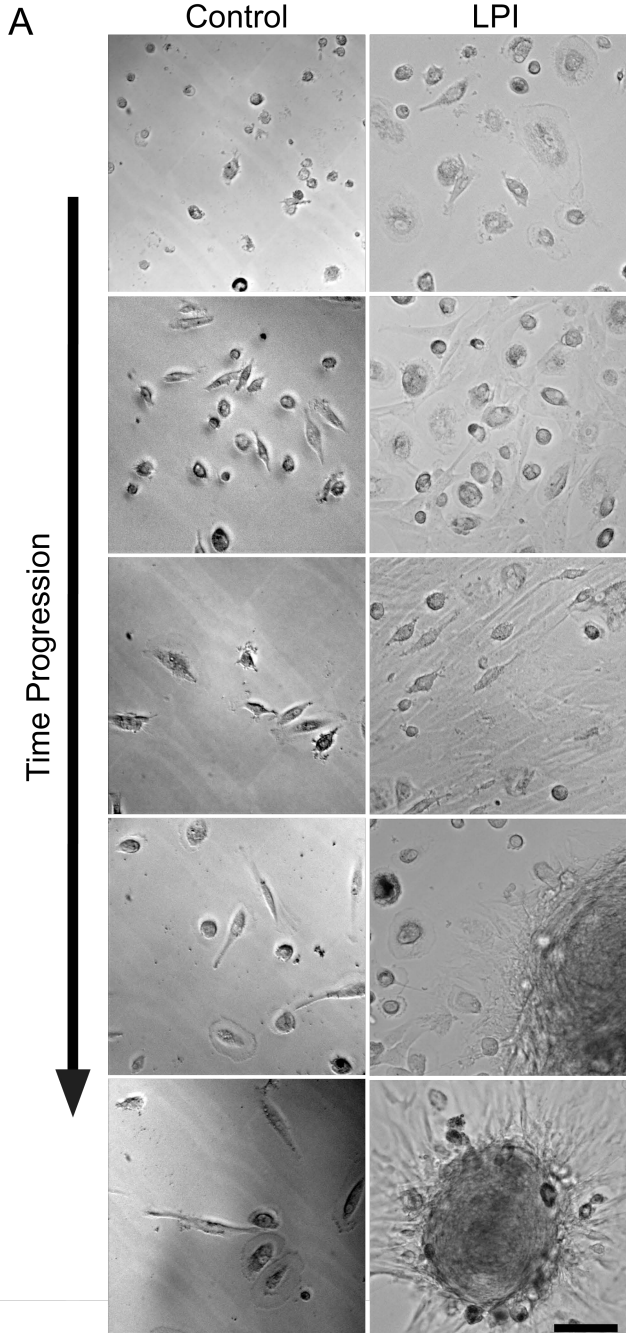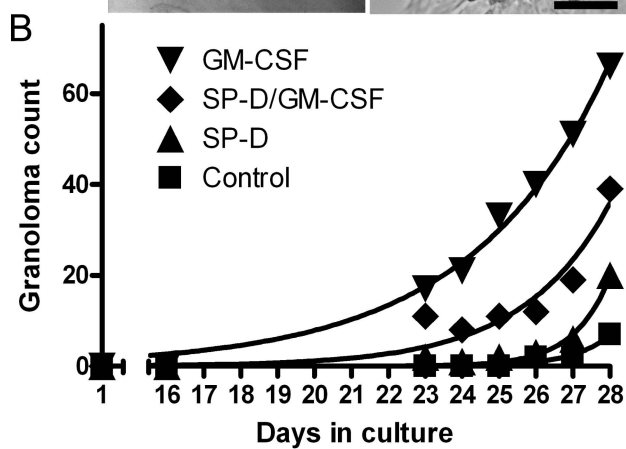

Supplement: MOESM5 [file 9641766]
